# Supplementary material for: Effects of crowding on the three main proteolytic mechanisms of skeletal muscle in rainbow trout (Oncorhynchus mykiss)
Source: PubMed Central journal article supplement (PMC7429773; doi:10.1186/s12917-020-02518-w), 2020-08-17

# Supplementary Fig. S1

## Acclimatization

7 days

High density

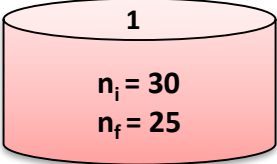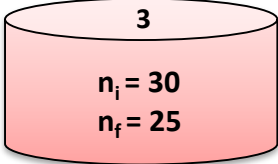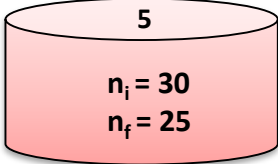

Low density

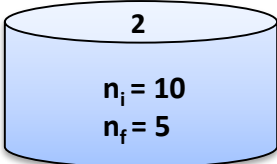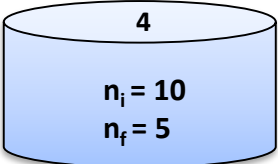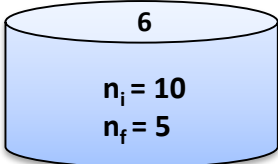

$n_i$  = Initial number of fish  
 $n_f$  = Final number of fish

Sampling: 5 rainbow trout per tank

To

15 days

45 days

60 days

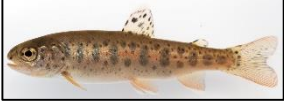

$7.24 \pm 1.35$  g  
body weight

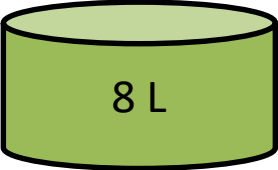

# Supplementary Fig. S2

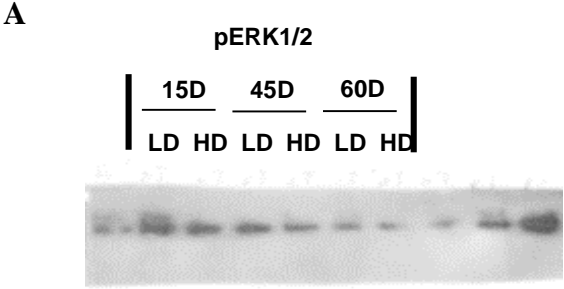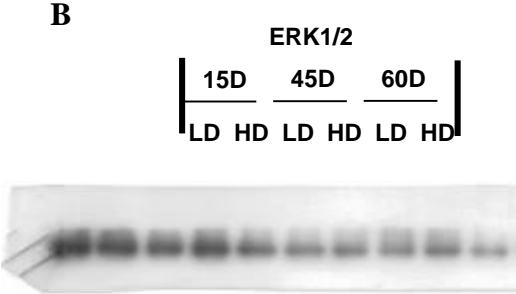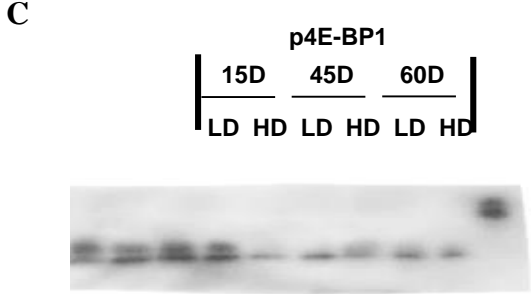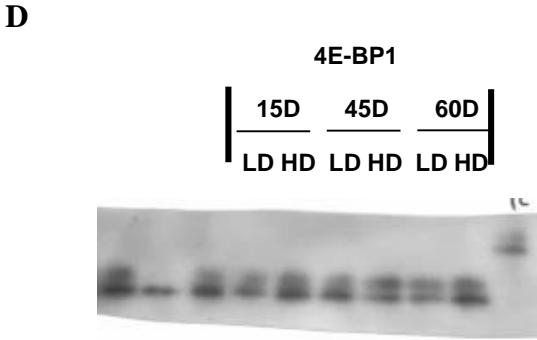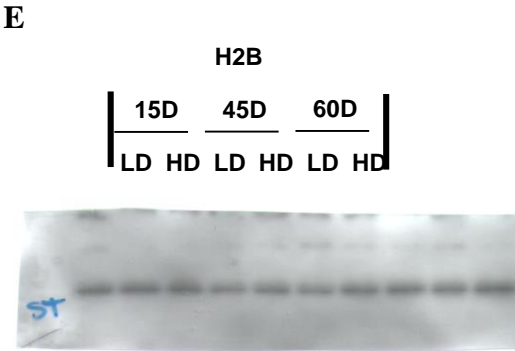

# Supplementary Fig. S3

A

Ubiquitinated proteins

| 15D |    | 45D |    | 60D |    |
|-----|----|-----|----|-----|----|
| LD  | HD | LD  | HD | LD  | HD |

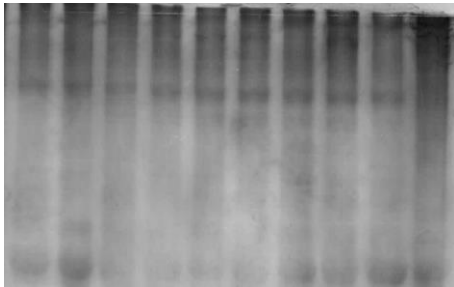

B

Coomasie blue

| 15D |    | 45D |    | 60D |    |
|-----|----|-----|----|-----|----|
| LD  | HD | LD  | HD | LD  | HD |

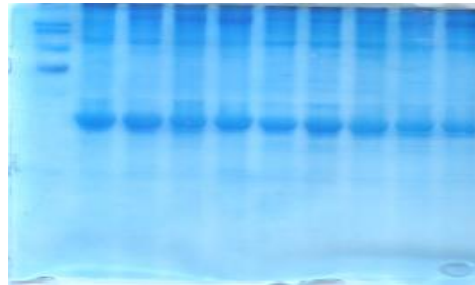

# Supplementary Fig. S4

A

P62/SQSTM1

| 15D |    | 45D |    | 60D |    |
|-----|----|-----|----|-----|----|
| LD  | HD | LD  | HD | LD  | HD |

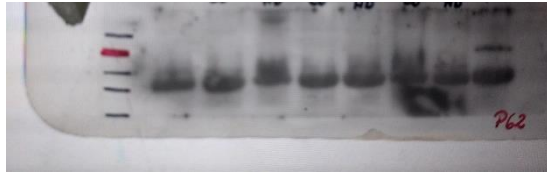

B

LC3-I/II

| 15D |    | 45D |    | 60D |    |
|-----|----|-----|----|-----|----|
| LD  | HD | LD  | HD | LD  | HD |

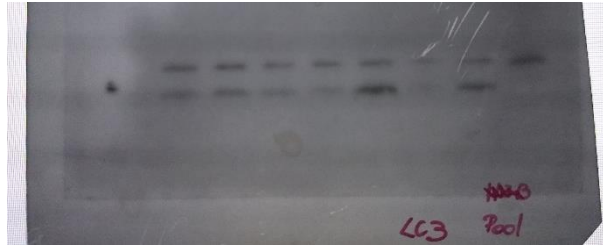

C

H2B

| 15D |    | 45D |    | 60D |    |
|-----|----|-----|----|-----|----|
| LD  | HD | LD  | HD | LD  | HD |

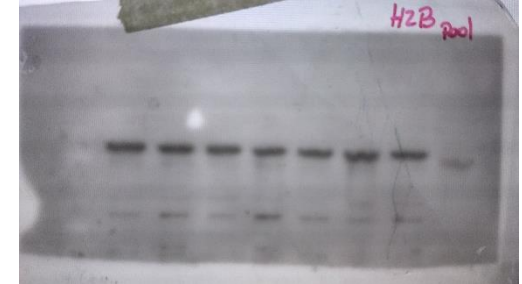

Supplement: 12917_2020_2518_MOESM1_ESM.pdf [file 12917_2020_2518_MOESM1_ESM.pdf]
